# Supplementary material for: Graphene oxide decorated with zinc oxide nanoflower, silver and titanium dioxide nanoparticles: fabrication, characterization, DNA interaction, and antibacterial activity
Source: Royal Society of Chemistry journal article supplement (doi:10.1039/c8ra09788g), 2019-01-01
Supplement: c8ra09788g1.pdf [file c8ra09788g1.pdf]

*For RSC Advances*

**Graphene oxide nanosheet decorated with zinc oxide nanoflower,  
silver and titanium dioxide NPs: Fabrication, characterization, DNA  
interaction, and antibacterial activity**

Nagi El-Shafai,<sup>ab</sup> Mohamed El-Khouly,<sup>\*c,d</sup> Maged El-Kemary,<sup>bc</sup> Mohamed  
Ramadan,<sup>a</sup> Ibrahim Eldesoukey,<sup>e</sup> and Mamdouh Masoud<sup>a</sup>

<sup>a</sup> Department of Chemistry, Faculty of Science, Alexandria University, Egypt

<sup>b</sup> Institute of Nanoscience and Nanotechnology, Kafrelsheikh University, Kafr El-Sheikh  
33516, Egypt

<sup>c</sup> Chemistry department, Faculty of Science, Kafrelsheikh University, Egypt

<sup>d</sup> Institute of Basic and Applied Sciences, Egypt-Japan Institute of Science and Technology,  
Alexandria, Egypt

<sup>e</sup> Bacteriology, Mycology and Immunology department, Faculty of Veterinary Medicine, Kafr  
El-Sheikh University 33516, Egypt

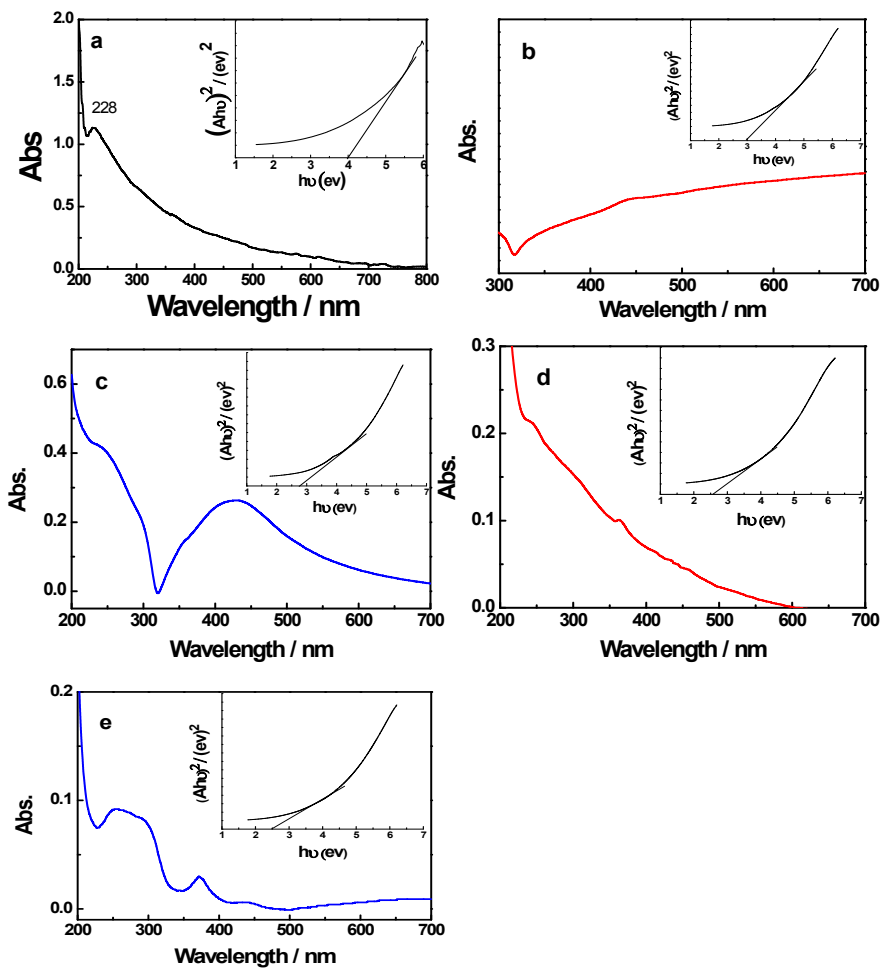

**Fig. S1** UV-vis spectra and energy gap of GO (a) GO-CuO (b), CuO (c), GO-CuO@ZnO (d) and ZnO (e).

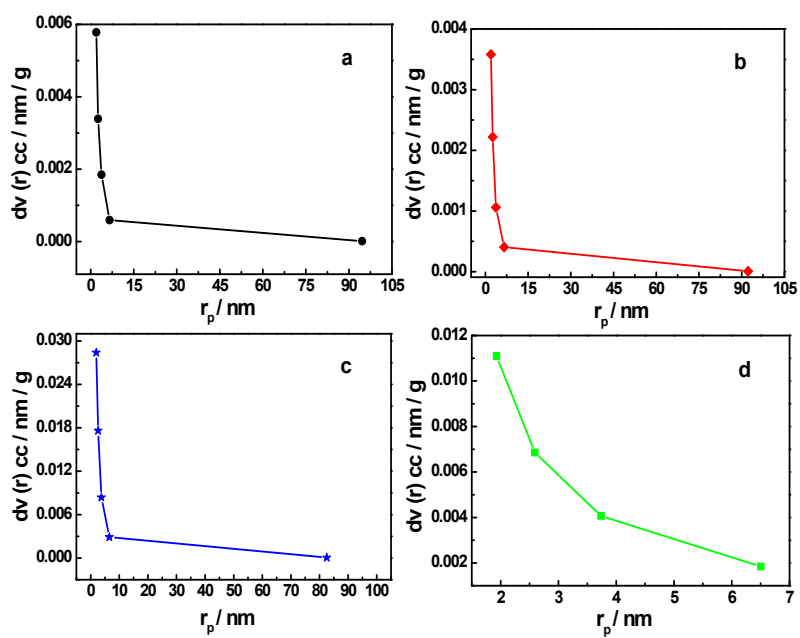

**Fig. S2.** BJH Pore size distribution of Ag (a) GO-Ag (b) GO-TiO<sub>2</sub>@ZnO (c), and GO-Ag-TiO<sub>2</sub>@ZnO (d) nanocomposites.
